# Supplementary material
Source: PubMed Central journal article supplement (PMC9252421)

## **Supplemental Material**

**Supplemental Table 1. Exclusion criteria and reasons for terminating CPET assessment**

| <b>Exclusion criteria</b>                                                                                                                                |
|----------------------------------------------------------------------------------------------------------------------------------------------------------|
| Acute serious cardiac or pulmonary illness within 6 months of exercise (myocardial infarction, unstable angina, pulmonary embolus, deep vein thrombosis) |
| Acute illness (i.e., infection) anticipated to limit exercise performance                                                                                |
| Mental impairment leading to the inability to cooperate with the exercise protocol                                                                       |
| Uncontrolled asthma                                                                                                                                      |
| Reduced pulse oximetry oxygen saturation ( $O_2$ saturation <88%)                                                                                        |
| Orthopedic injury anticipated to impact cycle-based lower extremity exercise performance                                                                 |
| History of exercise induced ventricular arrhythmias                                                                                                      |
| Neurologic disorder anticipated to impact cycle exercise performance                                                                                     |
| Exertional chest pain that has not been evaluated                                                                                                        |
| Potentially unsafe to exercise in the opinion of the supervising physician                                                                               |
| <b>Reasons for CPET termination</b>                                                                                                                      |
| Definitive ischemic ECG changes with associated chest pain                                                                                               |
| Complex ectopy (i.e., ventricular tachycardia)                                                                                                           |
| Mobitz 2 second-degree or third-degree heart block                                                                                                       |
| Symptomatic fall in systolic blood pressure >20 mmHg from the highest value during the test                                                              |
| Marked hypertension (systolic blood pressure >240 mmHg, diastolic blood pressure >120 mmHg)                                                              |
| Severe desaturation when accompanied by signs of severe hypoxia                                                                                          |
| Neurologic compromise such as mental confusion or loss of coordination                                                                                   |
| Supervising physician's discretion                                                                                                                       |

**Supplemental Table 2. Reasons that participants did not exercise (N=370, 10.6% of the total sample)**

| <b>Reason</b>                                                     | <b>N (% of total sample)</b> |
|-------------------------------------------------------------------|------------------------------|
| <i>Participant declined</i>                                       | 124 (3.6)                    |
| Musculoskeletal or orthopedic issue                               | 79 (2.3)                     |
| Anxiety, could not tolerate mouthpiece, or participant preference | 28 (0.8)                     |
| Other medical concern                                             | 17 (0.5)                     |
| <i>Excluded by supervising physician</i>                          | 185 (5.3)                    |
| Cardiovascular condition or symptom                               | 97 (2.8)                     |
| Musculoskeletal or orthopedic issue                               | 43 (1.2)                     |
| Pulmonary condition                                               | 12 (0.3)                     |
| Neurologic condition                                              | 15 (0.4)                     |
| Other medical condition                                           | 18 (0.5)                     |
| <i>Short visit, technical issue, or staffing limitation</i>       | 61 (1.7)                     |

## SUPPLEMENTAL FIGURE LEGENDS

**Supplemental Figure 1. Box plots of gas exchange variables by testing sequence.** The x-axis represents the sequence of that individual in the tests performed each day (tests usually performed in 30-minute intervals between 8AM and 12AM). Seven participants underwent CPET as the seventh test of the day but are not plotted here due to insufficient group size.

**Supplemental Figure 2. Box plots of values for effort-dependent exercise variables by peak RER categories stratified by clinical variables.** Panel (A) shows the relations of effort-dependent CPET variables by peak RER category separately for age greater than and below the median value of 54 years. Panel (B) displayed the relations of CPET variables and peak RER categories separately for men and women. Panel (C) displays the relations of CPET variables and peak RER categories separately for lean (BMI <25 kg/m<sup>2</sup>) and overweight/obese (BMI ≥25 kg/m<sup>2</sup>) participants.

Supplemental Figure 1.

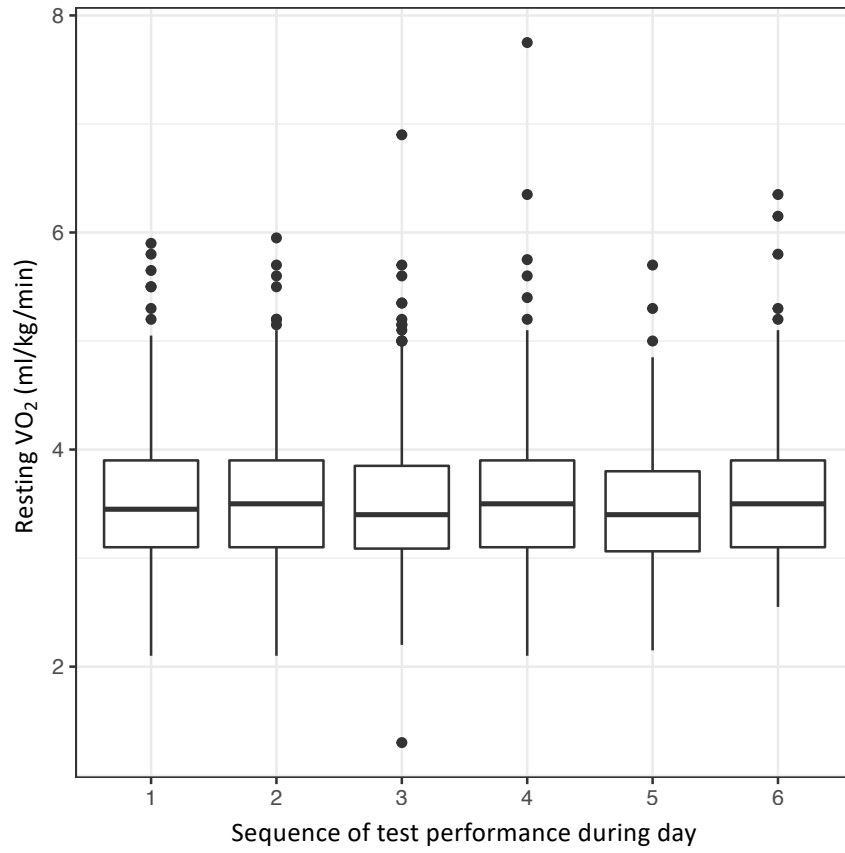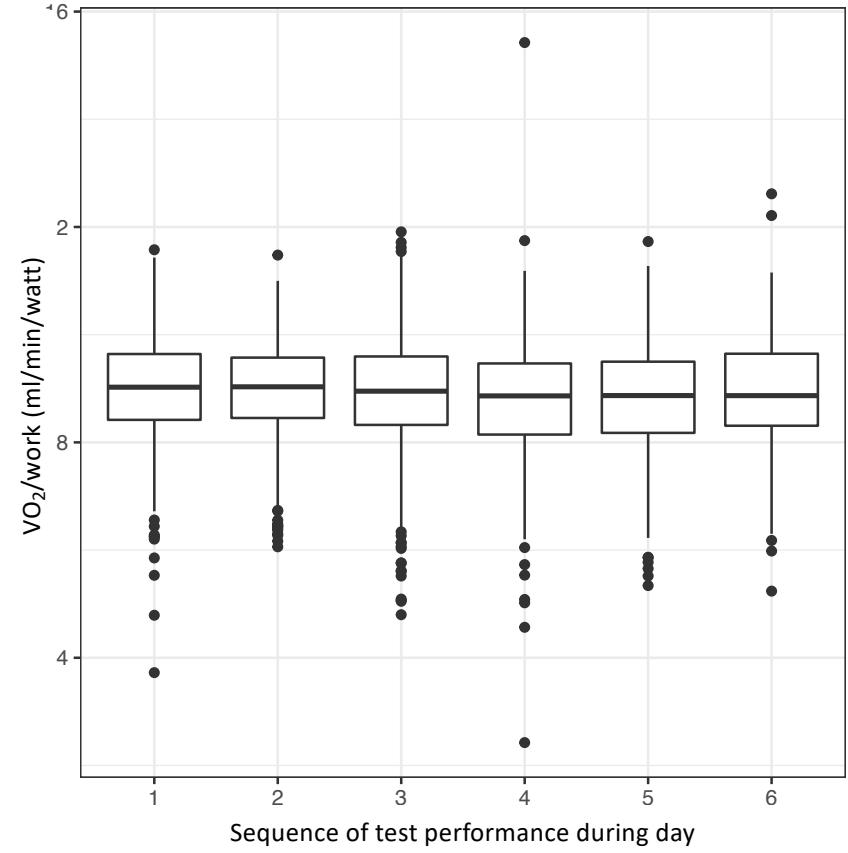

Supplemental Figure 2A.

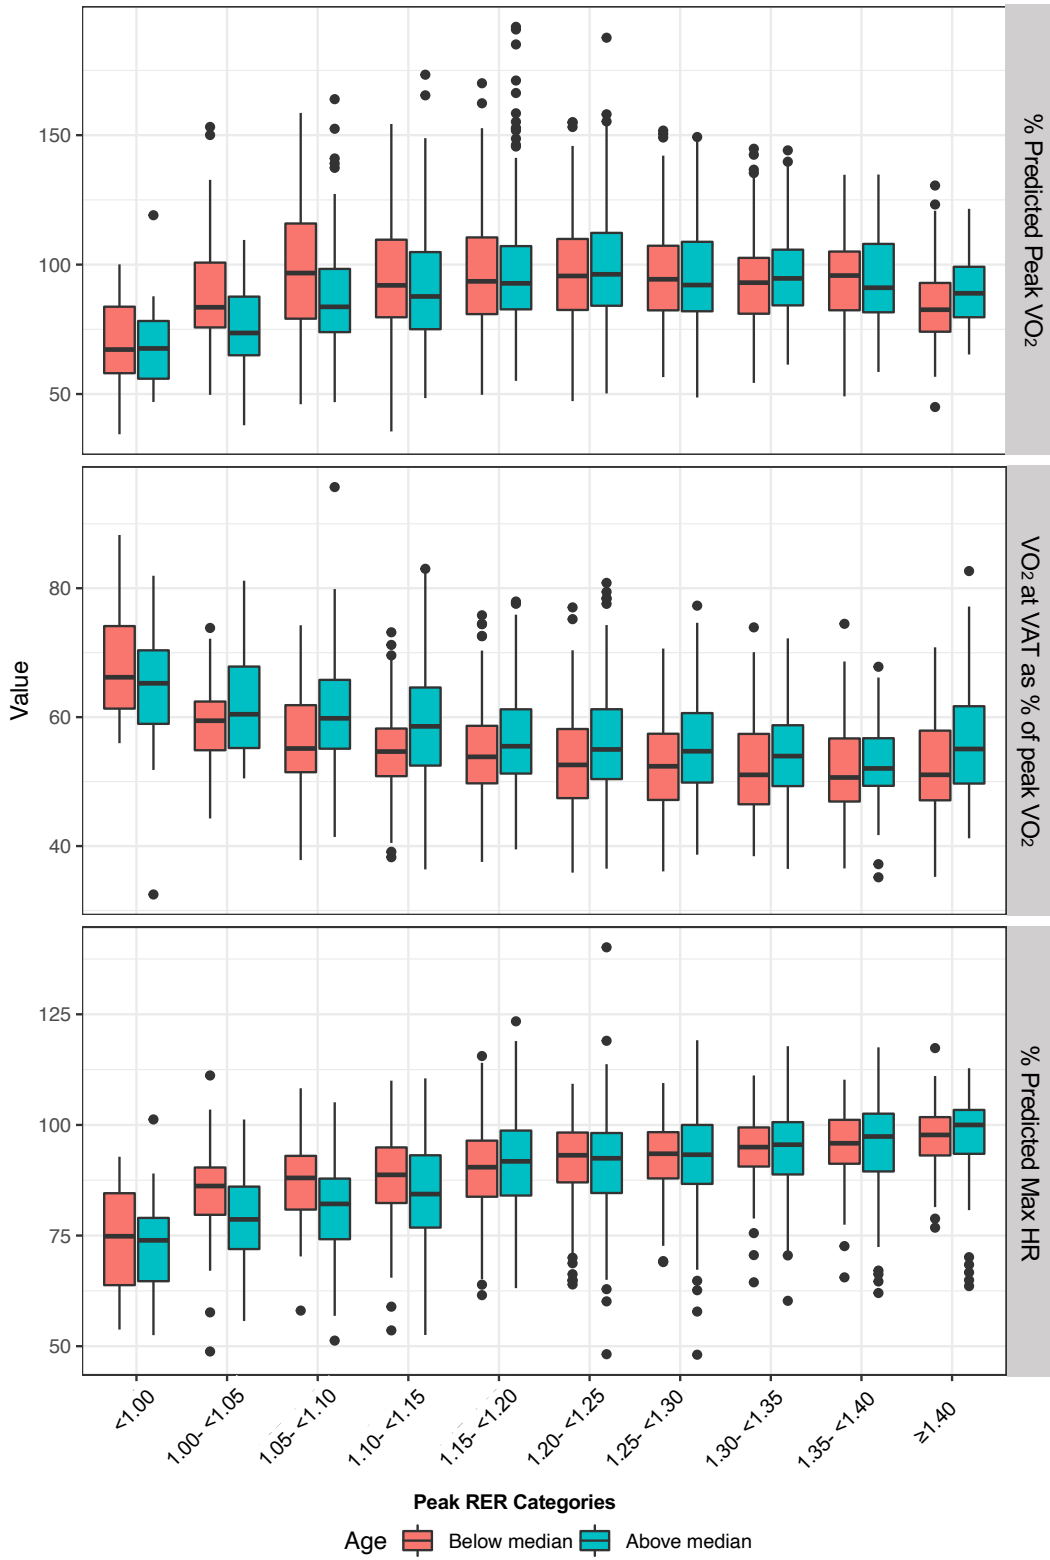

Supplemental Figure 2B.

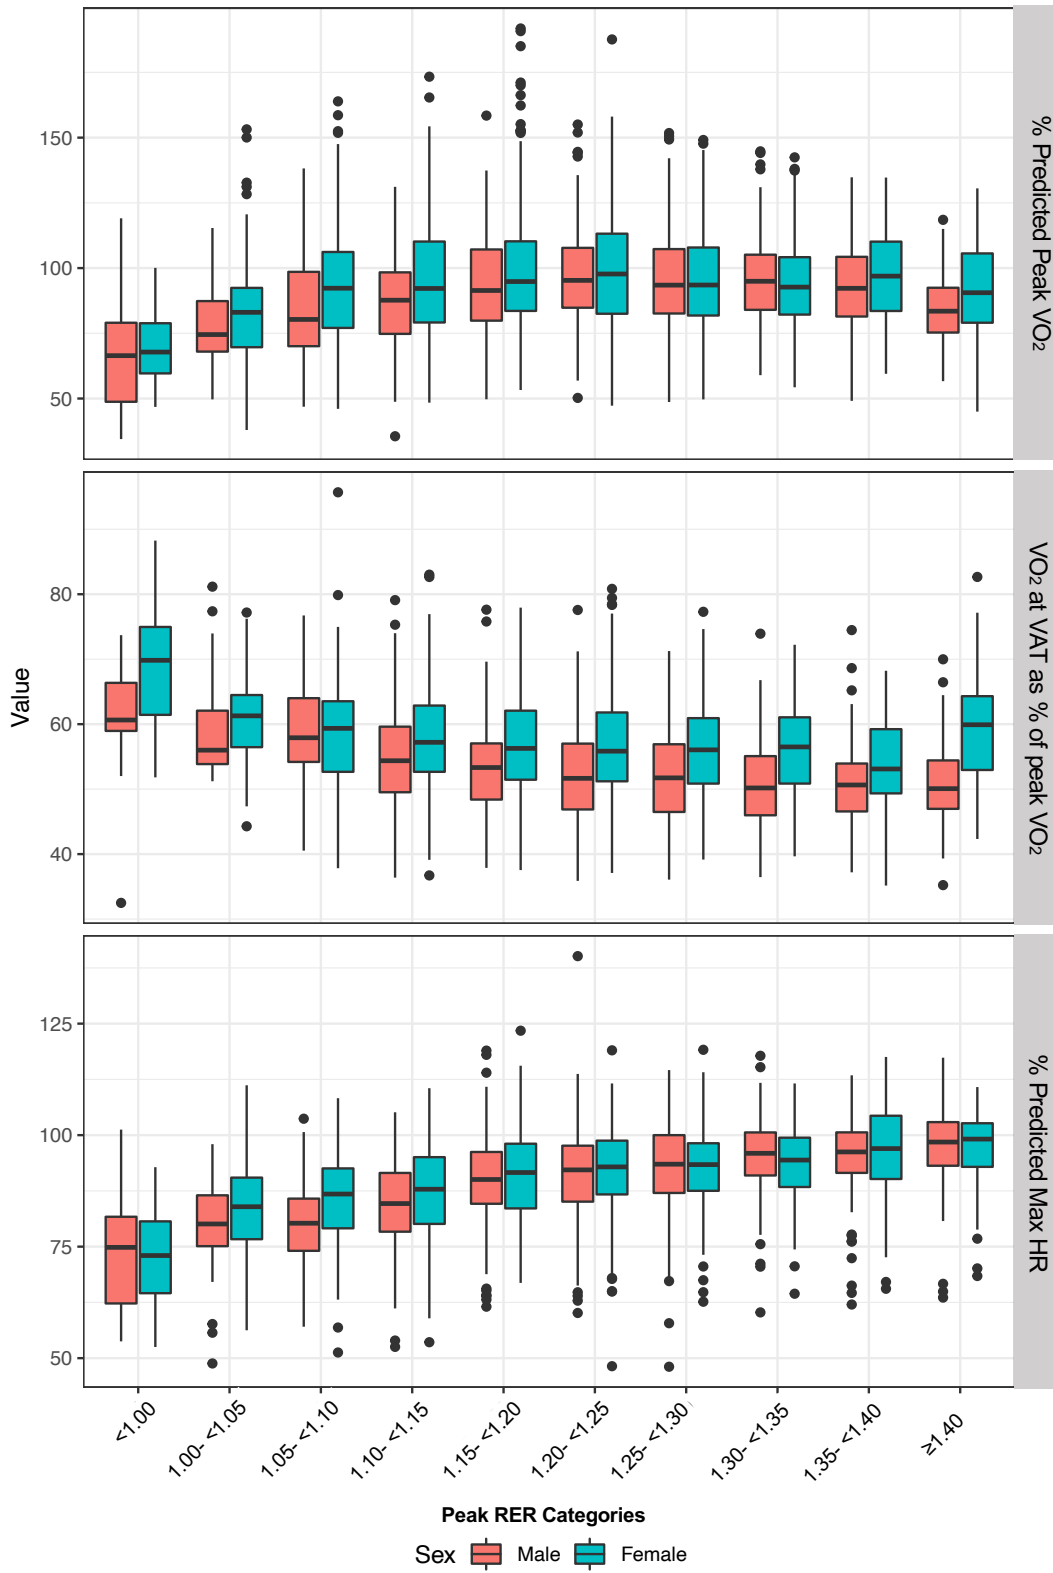

Supplemental Figure 2C.

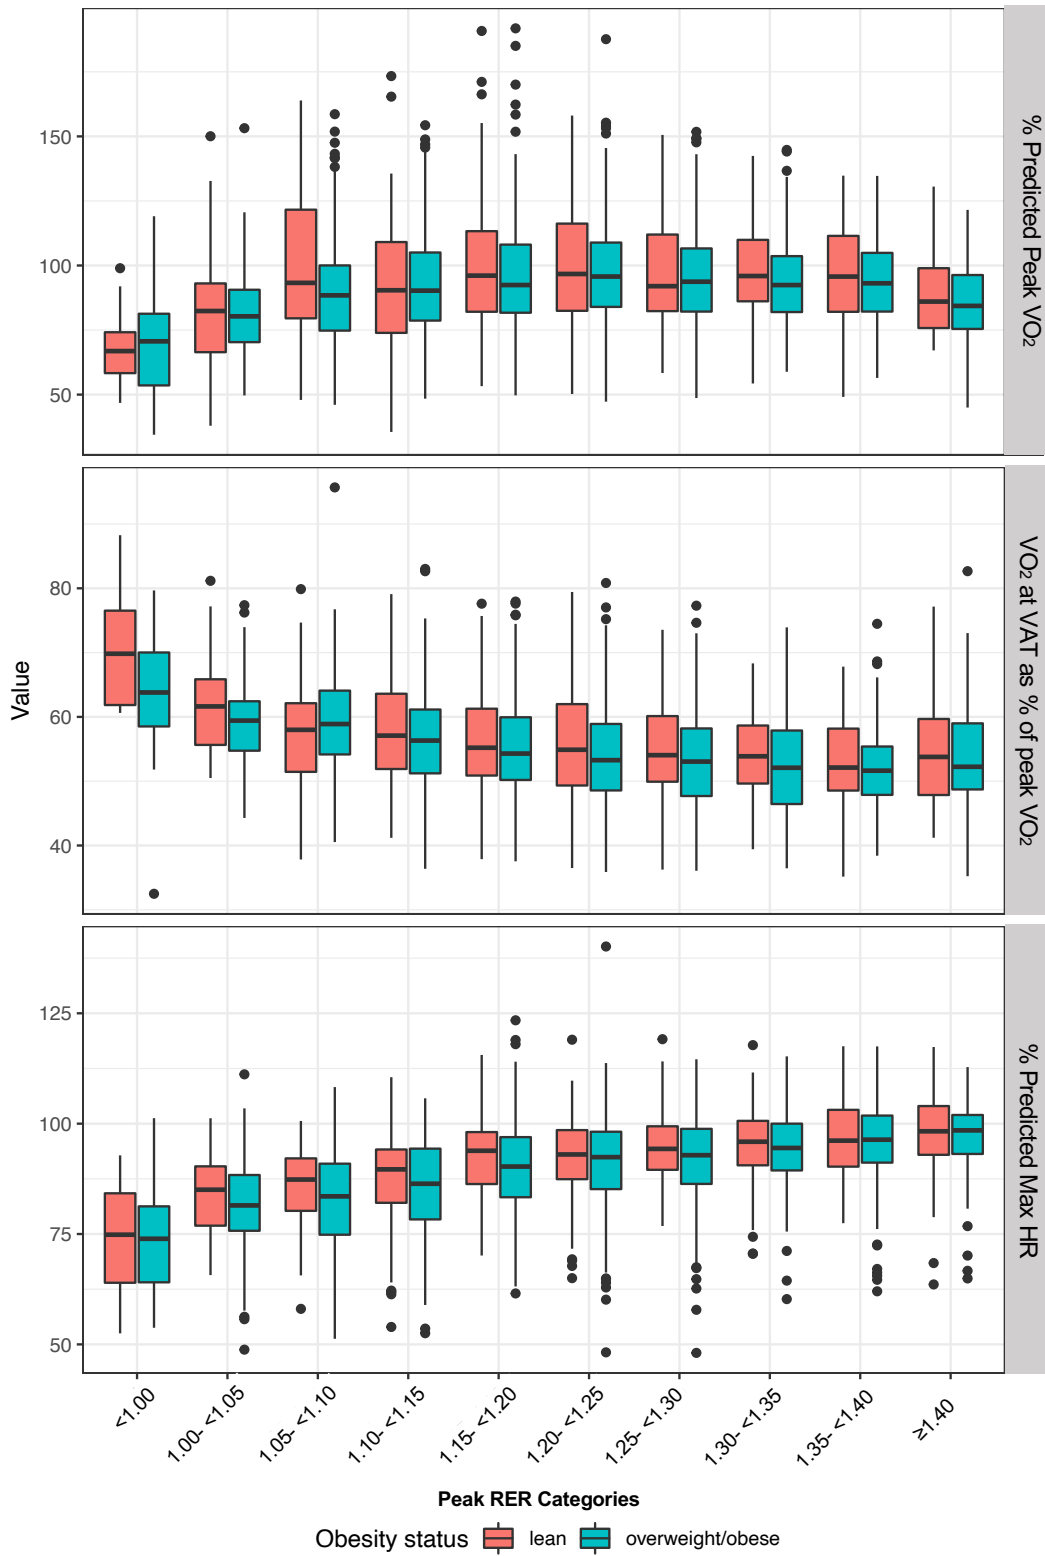

Supplement: NIHMS1734995-supplement-1.pdf [file NIHMS1734995-supplement-1.pdf]
